# Supplementary material
Source: Research Square preprint supplement (doi:10.21203/rs.3.rs-9539129/v1)
Supplement: Supplementary file 1 [file 1f44ef15ee8985f4bc2044b7.docx]

Table S4.PPI networks of *Arabidopsis* orthologs.

| AGI/UniProt/LOC | Gene Abbreviation | Gene Name |
| --- | --- | --- |
| **Treatment: T4 - Trait: DRW – Marker: *DArT*-15672192** | | |
| AT5G14640 | ASK5 | Shaggy-related protein kinase ε |
| AT1G78120 | LFG2 | LAG1 longevity assurance homolog 2 |
| Q9SL76 | P2C19_ARATH | Protein phosphatase 2C 19 |
| AT5G23280 | BSL3 | Protein phosphatase with Kelch-like domain 3 |
| AT4G13120 | BSK6 | Brassinosteroid signaling kinase 6 |
| AT5G53620 | GRF4 | Growth-regulating factor 4 |
| Q9LTC9 | Q9LTC9_ARATH | 26S proteasome regulatory subunit |
| Q9LTD0 | Q9LTD0_ARATH | 26S proteasome non-ATPase regulatory subunit |
| AT1G09390 | T4P13.15 | Protein of unknown function (DUF506 family) |
| AT3G26830 | F28P22 | F-box protein F28P22.1 |
| AT2G41715 | AGD13 | ADP-ribosylation factor GTPase-activating protein |
| **Treatment: T4 - Trait: DSW – Marker: *DArT*-100007602** | | |
| AT3G47180 | T8018.5 | Protein of unknown function (DUF506 domain) |
| AT1G14520 | MT2A | Metallothionein 2A (heavy metal binding) |
| AT1G68790 | HIPP23 | Heavy metal-associated isoprenylated protein 23 |
| AT1G26420 | FOP | tRNA modification enzyme FOP |
| AT5G60800 | HIPP22 | Heavy metal-associated isoprenylated protein 22 |
| AT1G72610 | HIPP21 | Heavy metal-associated isoprenylated protein 21 |
| AT4G12120 | MT1A | Metallothionein 1A (heavy metal detoxification) |
| **Treatment: T2, T3, and T4 - Trait: DSW and FSW – Marker: *DArT*-100007602 and DArT-15670616** | | |
| LOC107897327 | LOC107897327 | Hypothetical protein (unknown function) |
| LOC107904245 | LOC107904245 | Predicted stress-responsive protein |
| LOC107951622 | LOC107951622 | Putative transporter family member |
| LOC1079339294 | LOC1079339294 | Protein kinase-like domain protein |
| LOC107892093 | LOC107892093 | Metallothionein-related protein |
| LOC107937621 | LOC107937621 | Lipid metabolism-associated protein |
| LOC107915802 | LOC107915802 | Transcription factor candidate |
| LOC107910454 | LOC107910454 | Heavy metal-binding protein |
| LOC107939801 | LOC107939801 | Drought-responsive hypothetical protein |
| LOC107934531 | LOC107934531 | QTL-associated candidate gene |
| LOC107912365 | LOC107912365 | Phosphatase family protein |
