# Supplementary material
Source: Research Square preprint supplement (doi:10.21203/rs.3.rs-9539129/v1)
Supplement: Supplementary file 2 [file 475e1afdec958bec1a4d4611.docx]

Table S2. Results of the soil analysis revealed essential micro- and macro-nutrients.

| **Micro nutrients** | | | | | | | **Macro nutrients (mg kg-1)** | | | | |
| --- | --- | --- | --- | --- | --- | --- | --- | --- | --- | --- | --- |
| pH | Eco mS m-1 | Organic matter (%) | Available P (mg kg-1) | Available K (mg kg-1) | Saturation (%) | Texture | Zn | Fe | B | Mn | Cu |
| 8.6 | 1.2 | 0.84 | 2.7 | 204 | 32 | Loam | 1.58 | 4.8 | 0.46 | 7.3 | 0.78 |

P = Phosphorus, K = Potassium, Zn = Zinc, Fe = Iron, B = Boron, Mn = Manganese, Cu = Copper.
