# Supplementary material
Source: Research Square preprint supplement (doi:10.21203/rs.3.rs-9539129/v1)
Supplement: Supplementary file 3 [file cb1470166f5e044009554e87.docx]

Table S3. Genome-wide association mapping identified 180 marker-trait associations using MLM model.

| **Trait** | **Marker** | **Chromosome** | ***p*-value** | **Marker R2** | **Genetic var** | **Residual var** |
| --- | --- | --- | --- | --- | --- | --- |
| DRW1 | 17813229 | CtAH07 | 3.33E-04 | 0.15803 | 1.41E-04 | 3.59E-04 |
| DRW1 | 45482256 | CtAH03 | 6.04E-04 | 0.14221 | 1.41E-04 | 3.59E-04 |
| DRW1 | 15673451 | CtAH05 | 6.16E-04 | 0.14523 | 1.41E-04 | 3.59E-04 |
| DRW1 | 38081467 | CtAH05 | 6.97E-04 | 0.14985 | 1.41E-04 | 3.59E-04 |
| DRW2 | 45480913 | CtAH09 | 4.36E-04 | 0.16389 | 2.35E-04 | 3.03E-05 |
| DRW2 | 45482938 | CtAH06 | 8.41E-04 | 0.13398 | 2.35E-04 | 3.03E-05 |
| DRW2 | 45482977 | CtAH04 | 8.42E-04 | 0.13406 | 2.35E-04 | 3.03E-05 |
| DRW2 | 17813765 | CtAH02 | 8.52E-04 | 0.13599 | 2.35E-04 | 3.03E-05 |
| DRW2 | 45482355 | CtAH03 | 8.71E-04 | 0.13873 | 2.35E-04 | 3.03E-05 |
| DRW3 | 45486569 | CtAH05 | 5.37E-05 | 0.21327 | 1.59E-04 | 2.59E-04 |
| DRW3 | 45480057 | CtAH05 | 6.11E-05 | 0.22296 | 1.59E-04 | 2.59E-04 |
| DRW3 | 45486543 | CtAH04 | 1.53E-04 | 0.18272 | 1.59E-04 | 2.59E-04 |
| DRW3 | 45481791 | CtAH12 | 2.84E-04 | 0.20722 | 1.59E-04 | 2.59E-04 |
| DRW3 | 22763385 | CtAH05 | 3.25E-04 | 0.18461 | 1.59E-04 | 2.59E-04 |
| DRW3 | 22759984 | CtAH02 | 4.14E-04 | 0.16702 | 1.59E-04 | 2.59E-04 |
| DRW3 | 100034291 | CtAH02 | 5.34E-04 | 0.1465 | 1.59E-04 | 2.59E-04 |
| DRW3 | 17813665 | CtAH04 | 5.51E-04 | 0.14867 | 1.59E-04 | 2.59E-04 |
| DRW3 | 15670692 | CtAH08 | 7.58E-04 | 0.15779 | 1.59E-04 | 2.59E-04 |
| DRW3 | 38077734 | CtAH07 | 7.58E-04 | 0.16665 | 1.59E-04 | 2.59E-04 |
| DRW3 | 45484642 | CtAH06 | 8.86E-04 | 0.14266 | 1.59E-04 | 2.59E-04 |
| DRW3 | 100006239 | CtAH03 | 9.98E-04 | 0.13524 | 1.59E-04 | 2.59E-04 |
| DRW3 | 45486699 | CtAH11 | 9.98E-04 | 0.1371 | 1.59E-04 | 2.59E-04 |
| DRW4 | 15672192 | CtAH08 | 8.70E-04 | 0.13087 | 1.31E-09 | 1.31E-04 |
| DSW1 | 45481163 | CtAH11 | 1.29E-04 | 0.18609 | 2.95E-04 | 4.80E-05 |
| DSW1 | 45482639 | CtAH11 | 1.86E-04 | 0.17368 | 2.95E-04 | 4.80E-05 |
| DSW1 | 45481339 | CtAH07 | 2.08E-04 | 0.17071 | 2.95E-04 | 4.80E-05 |
| DSW1 | 15671121 | CtAH09 | 2.46E-04 | 0.16319 | 2.95E-04 | 4.80E-05 |
| DSW1 | 45483072 | CtAH01 | 3.43E-04 | 0.154 | 2.95E-04 | 4.80E-05 |
| DSW1 | 45482683 | CtAH11 | 3.63E-04 | 0.15416 | 2.95E-04 | 4.80E-05 |
| DSW1 | 45480829 | CtAH11 | 3.97E-04 | 0.15663 | 2.95E-04 | 4.80E-05 |
| DSW1 | 45487233 | CtAH11 | 5.59E-04 | 0.16051 | 2.95E-04 | 4.80E-05 |
| DSW2 | 15671121 | CtAH09 | 6.62E-05 | 0.19663 | 3.79E-05 | 6.50E-06 |
| DSW2 | 17812962 | CtAH03 | 2.84E-04 | 0.16186 | 3.79E-05 | 6.50E-06 |
| DSW2 | 38083511 | CtAH06 | 6.73E-04 | 0.14443 | 3.79E-05 | 6.50E-06 |
| DSW2 | 45480447 | CtAH06 | 8.97E-04 | 0.13134 | 3.79E-05 | 6.50E-06 |
| DSW2 | 38086042 | CtAH01 | 9.30E-04 | 0.13788 | 3.79E-05 | 6.50E-06 |
| DSW3 | 15671121 | CtAH09 | 1.42E-04 | 0.17748 | 1.34E-05 | 4.10E-06 |
| DSW3 | 45480447 | CtAH06 | 4.22E-04 | 0.14959 | 1.34E-05 | 4.10E-06 |
| DSW3 | 38079697 | CtAH12 | 4.95E-04 | 0.17804 | 1.34E-05 | 4.10E-06 |
| DSW3 | 45481339 | CtAH07 | 9.67E-04 | 0.13268 | 1.34E-05 | 4.10E-06 |
| DSW3 | 15670616 | CtAH06 | 9.93E-04 | 0.13192 | 1.34E-05 | 4.10E-06 |
| DSW4 | 45482256 | CtAH03 | 1.32E-04 | 0.18079 | 5.74E-05 | 3.35E-05 |
| DSW4 | 15671121 | CtAH09 | 1.85E-04 | 0.17273 | 5.74E-05 | 3.35E-05 |
| DSW4 | 45479921 | CtAH08 | 1.95E-04 | 0.18365 | 5.74E-05 | 3.35E-05 |
| DSW4 | 17813229 | CtAH07 | 3.35E-04 | 0.15752 | 5.74E-05 | 3.35E-05 |
| DSW4 | 15673451 | CtAH05 | 4.13E-04 | 0.15352 | 5.74E-05 | 3.35E-05 |
| DSW4 | 22761195 | CtAH06 | 4.28E-04 | 0.1538 | 5.74E-05 | 3.35E-05 |
| DSW4 | 22762202 | CtAH09 | 4.48E-04 | 0.1673 | 5.74E-05 | 3.35E-05 |
| DSW4 | 22761341 | CtAH10 | 4.52E-04 | 0.15291 | 5.74E-05 | 3.35E-05 |
| DSW4 | 17812962 | CtAH03 | 5.82E-04 | 0.14611 | 5.74E-05 | 3.35E-05 |
| DSW4 | 38084519 | CtAH12 | 6.76E-04 | 0.1536 | 5.74E-05 | 3.35E-05 |
| DSW4 | 100007602 | CtAH05 | 7.35E-04 | 0.13814 | 5.74E-05 | 3.35E-05 |
| DSW4 | 15670616 | CtAH06 | 7.37E-04 | 0.1397 | 5.74E-05 | 3.35E-05 |
| DSW4 | 45482231 | CtAH03 | 8.57E-04 | 0.14342 | 5.74E-05 | 3.35E-05 |
| DSW4 | 45481959 | CtAH12 | 9.00E-04 | 0.13988 | 5.74E-05 | 3.35E-05 |
| DSW4 | 17814758 | CtAH08 | 9.09E-04 | 0.1382 | 5.74E-05 | 3.35E-05 |
| DSW4 | 22762203 | CtAH09 | 9.57E-04 | 0.1409 | 5.74E-05 | 3.35E-05 |
| FRW1 | 45482256 | CtAH03 | 0.00011 | 0.18508 | 0.0038 | 0.00419 |
| FRW1 | 38081467 | CtAH05 | 0.00033 | 0.18006 | 0.0038 | 0.00419 |
| FRW1 | 22764383 | CtAH03 | 0.00058 | 0.16763 | 0.0038 | 0.00419 |
| FRW1 | 38079244 | CtAH09 | 0.0008 | 0.14562 | 0.0038 | 0.00419 |
| FRW2 | 15673766 | CtAH10 | 4.8E-05 | 0.2182 | 0.00266 | 0.0031 |
| FRW2 | 45484275 | CtAH06 | 0.00048 | 0.16486 | 0.00266 | 0.0031 |
| FRW2 | 45482772 | CtAH05 | 0.00069 | 0.14112 | 0.00266 | 0.0031 |
| FRW2 | 17814633 | CtAH07 | 0.00087 | 0.13867 | 0.00266 | 0.0031 |
| FRW2 | 15671272 | CtAH08 | 0.00098 | 0.1617 | 0.00266 | 0.0031 |
| FRW3 | 15671516 | CtAH05 | 1.55E-04 | 0.18312 | 6.90E-08 | 0.0069 |
| FRW3 | 38084371 | CtAH06 | 6.49E-04 | 0.14998 | 6.90E-08 | 0.0069 |
| FRW3 | 15673161 | CtAH08 | 8.46E-04 | 0.13736 | 6.90E-08 | 0.0069 |
| FRW3 | 45478899 | CtAH08 | 9.03E-04 | 0.13023 | 6.90E-08 | 0.0069 |
| FRW3 | 100005293 | CtAH06 | 9.39E-04 | 0.12258 | 6.90E-08 | 0.0069 |
| FRW3 | 38079594 | CtAH05 | 9.39E-04 | 0.12258 | 6.90E-08 | 0.0069 |
| FRW3 | 22759981 | CtAH05 | 9.82E-04 | 0.13587 | 6.90E-08 | 0.0069 |
| FRW4 | 15671514 | CtAH02 | 1.37E-04 | 0.17617 | 5.48E-08 | 0.00548 |
| FRW4 | 15673440 | CtAH08 | 3.71E-04 | 0.17607 | 5.48E-08 | 0.00548 |
| FRW4 | 45482919 | CtAH05 | 4.53E-04 | 0.14409 | 5.48E-08 | 0.00548 |
| FRW4 | 17814184 | CtAH09 | 7.38E-04 | 0.13374 | 5.48E-08 | 0.00548 |
| FSW1 | 45479942 | CtAH09 | 6.8E-05 | 0.21263 | 0.00234 | 0.00683 |
| FSW1 | 22760187 | CtAH05 | 0.00022 | 0.17919 | 0.00234 | 0.00683 |
| FSW1 | 38080459 | CtAH10 | 0.00035 | 0.18729 | 0.00234 | 0.00683 |
| FSW1 | 22761098 | CtAH03 | 0.00046 | 0.15821 | 0.00234 | 0.00683 |
| FSW2 | 45487535 | CtAH12 | 0.00018 | 0.1734 | 0.00144 | 0.00369 |
| FSW2 | 45485516 | CtAH04 | 0.00043 | 0.16201 | 0.00144 | 0.00369 |
| FSW2 | 17813915 | CtAH12 | 0.00047 | 0.15341 | 0.00144 | 0.00369 |
| FSW2 | 45481321 | CtAH01 | 0.00057 | 0.14123 | 0.00144 | 0.00369 |
| FSW2 | 15673776 | CtAH10 | 0.00061 | 0.14313 | 0.00144 | 0.00369 |
| FSW2 | 38086036 | CtAH01 | 0.00065 | 0.14323 | 0.00144 | 0.00369 |
| FSW2 | 45479833 | CtAH01 | 0.0007 | 0.13935 | 0.00144 | 0.00369 |
| FSW2 | 15670616 | CtAH06 | 0.0007 | 0.13946 | 0.00144 | 0.00369 |
| FSW2 | 17814035 | CtAH11 | 0.00081 | 0.14915 | 0.00144 | 0.00369 |
| FSW2 | 45480444 | CtAH01 | 0.00081 | 0.13446 | 0.00144 | 0.00369 |
| FSW2 | 45483088 | CtAH04 | 0.00085 | 0.13664 | 0.00144 | 0.00369 |
| FSW3 | 100005136 | CtAH10 | 1.73E-04 | 0.17422 | 5.04E-04 | 0.00627 |
| FSW3 | 17814102 | CtAH07 | 1.97E-04 | 0.18484 | 5.04E-04 | 0.00627 |
| FSW3 | 15671902 | CtAH06 | 2.42E-04 | 0.16411 | 5.04E-04 | 0.00627 |
| FSW3 | 45480432 | CtAH02 | 2.44E-04 | 0.16562 | 5.04E-04 | 0.00627 |
| FSW3 | 15673763 | CtAH08 | 3.53E-04 | 0.1536 | 5.04E-04 | 0.00627 |
| FSW3 | 100038184 | CtAH10 | 4.17E-04 | 0.14962 | 5.04E-04 | 0.00627 |
| FSW3 | 45484702 | CtAH06 | 4.86E-04 | 0.14614 | 5.04E-04 | 0.00627 |
| FSW3 | 100014050 | CtAH10 | 5.26E-04 | 0.14404 | 5.04E-04 | 0.00627 |
| FSW3 | 45480304 | CtAH06 | 8.06E-04 | 0.13389 | 5.04E-04 | 0.00627 |
| FSW3 | 22764658 | CtAH09 | 8.62E-04 | 0.13306 | 5.04E-04 | 0.00627 |
| FSW3 | 100005060 | CtAH07 | 9.40E-04 | 0.13113 | 5.04E-04 | 0.00627 |
| FSW3 | 15670903 | CtAH07 | 9.91E-04 | 0.13198 | 5.04E-04 | 0.00627 |
| FSW4 | 45478824 | CtAH08 | 1.74E-04 | 0.18791 | 8.63E-08 | 0.00863 |
| FSW4 | 45484399 | CtAH06 | 2.31E-04 | 0.16639 | 8.63E-08 | 0.00863 |
| FSW4 | 45483563 | CtAH07 | 6.90E-04 | 0.16486 | 8.63E-08 | 0.00863 |
| FSW4 | 45481749 | CtAH12 | 7.37E-04 | 0.1457 | 8.63E-08 | 0.00863 |
| FSW4 | 45486458 | CtAH08 | 8.01E-04 | 0.14166 | 8.63E-08 | 0.00863 |
| FSW4 | 22760974 | CtAH11 | 9.62E-04 | 0.1329 | 8.63E-08 | 0.00863 |
| FSW4 | 45485580 | CtAH02 | 9.64E-04 | 0.13338 | 8.63E-08 | 0.00863 |
| NOL1 | 15671718 | CtAH07 | 5.01E-04 | 0.14024 | 3.88E-06 | 0.38791 |
| NOL1 | 45486819 | CtAH12 | 6.94E-04 | 0.13111 | 3.88E-06 | 0.38791 |
| NOL1 | 45484659 | CtAH02 | 9.51E-04 | 0.12422 | 3.88E-06 | 0.38791 |
| NOL1 | 15672357 | CtAH04 | 9.93E-04 | 0.12805 | 3.88E-06 | 0.38791 |
| NOL2 | 38080188 | CtAH07 | 5.39E-04 | 0.15557 | 4.17E-06 | 0.4168 |
| NOL3 | 17813765 | CtAH02 | 0.00043 | 0.14566 | 0.05066 | 0.34951 |
| NOL3 | 22759981 | CtAH05 | 0.00063 | 0.14908 | 0.05066 | 0.34951 |
| NOL3 | 38078980 | CtAH01 | 0.00084 | 0.13684 | 0.05066 | 0.34951 |
| NOL4 | 15671905 | CtAH04 | 0.00029 | 0.17408 | 0.06056 | 0.1675 |
| NOL4 | 45482269 | CtAH04 | 0.00046 | 0.15187 | 0.06056 | 0.1675 |
| NOL4 | 45482276 | CtAH07 | 0.00061 | 0.14816 | 0.06056 | 0.1675 |
| NOL4 | 100006968 | CtAH11 | 0.00063 | 0.14275 | 0.06056 | 0.1675 |
| NOL4 | 22761458 | CtAH07 | 0.00075 | 0.14333 | 0.06056 | 0.1675 |
| NOL4 | 45482340 | CtAH08 | 0.00078 | 0.13809 | 0.06056 | 0.1675 |
| NOL4 | 45485580 | CtAH02 | 0.00079 | 0.14159 | 0.06056 | 0.1675 |
| NOL4 | 45482292 | CtAH08 | 0.00095 | 0.13366 | 0.06056 | 0.1675 |
| PH1 | 15671246 | CtAH01 | 0.00012 | 0.19002 | 0.04918 | 0.33966 |
| PH1 | 15671785 | CtAH01 | 0.0002 | 0.18424 | 0.04918 | 0.33966 |
| PH1 | 15670055 | CtAH09 | 0.00042 | 0.16005 | 0.04918 | 0.33966 |
| PH2 | 45485160 | CtAH03 | 4.05E-04 | 0.1479 | 4.73E-06 | 0.47331 |
| PH2 | 22763547 | CtAH03 | 7.89E-04 | 0.13298 | 4.73E-06 | 0.47331 |
| PH2 | 15670811 | CtAH08 | 8.67E-04 | 0.1476 | 4.73E-06 | 0.47331 |
| PH2 | 45479808 | CtAH09 | 8.91E-04 | 0.13949 | 4.73E-06 | 0.47331 |
| PH4 | 15673678 | CtAH05 | 0.00031 | 0.15563 | 0.05604 | 0.46995 |
| PH4 | 22763839 | CtAH08 | 0.00059 | 0.14639 | 0.05604 | 0.46995 |
| PH4 | 17813278 | CtAH03 | 0.00066 | 0.14596 | 0.05604 | 0.46995 |
| PH4 | 22763481 | CtAH05 | 0.00067 | 0.14361 | 0.05604 | 0.46995 |
| PH4 | 15673064 | CtAH06 | 0.00068 | 0.15522 | 0.05604 | 0.46995 |
| PH4 | 45486700 | CtAH05 | 0.00085 | 0.13132 | 0.05604 | 0.46995 |
| PH4 | 17814223 | CtAH11 | 0.00097 | 0.13075 | 0.05604 | 0.46995 |
| RL1 | 45480829 | CtAH11 | 0.00061 | 0.15751 | 0.1517 | 2.23253 |
| RL2 | 45488103 | CtAH06 | 1.29E-04 | 0.17888 | 1.97E-05 | 1.97042 |
| RL2 | 45484417 | CtAH01 | 3.31E-04 | 0.15062 | 1.97E-05 | 1.97042 |
| RL2 | 15673120 | CtAH03 | 3.53E-04 | 0.14881 | 1.97E-05 | 1.97042 |
| RL2 | 45487369 | CtAH06 | 6.06E-04 | 0.14155 | 1.97E-05 | 1.97042 |
| RL2 | 45478817 | CtAH12 | 7.63E-04 | 0.13117 | 1.97E-05 | 1.97042 |
| RL3 | 45478620 | CtAH01 | 0.00037 | 0.15778 | 0.33764 | 2.32071 |
| RL3 | 45484520 | CtAH08 | 0.0005 | 0.15487 | 0.33764 | 2.32071 |
| RL3 | 38085509 | CtAH09 | 0.00073 | 0.14395 | 0.33764 | 2.32071 |
| RL3 | 45479789 | CtAH04 | 0.00074 | 0.15164 | 0.33764 | 2.32071 |
| RL3 | 45487710 | CtAH12 | 0.00078 | 0.14303 | 0.33764 | 2.32071 |
| RL3 | 45479663 | CtAH02 | 0.00085 | 0.1437 | 0.33764 | 2.32071 |
| RL3 | 15672689 | CtAH08 | 0.00093 | 0.13833 | 0.33764 | 2.32071 |
| RL3 | 45482131 | CtAH07 | 0.00094 | 0.13542 | 0.33764 | 2.32071 |
| RL4 | 22764332 | CtAH05 | 0.00041 | 0.16325 | 0.47107 | 1.46093 |
| RL4 | 45478613 | CtAH08 | 0.00067 | 0.15779 | 0.47107 | 1.46093 |
| RL4 | 15672975 | CtAH06 | 0.00078 | 0.14416 | 0.47107 | 1.46093 |
| RL4 | 45480741 | CtAH11 | 0.00096 | 0.15308 | 0.47107 | 1.46093 |
| RSR1 | 15670863 | CtAH03 | 0.00054 | 0.14681 | 0.00421 | 0.00925 |
| RSR1 | 15673748 | CtAH01 | 0.0006 | 0.14388 | 0.00421 | 0.00925 |
| RSR1 | 45482256 | CtAH03 | 0.00068 | 0.1405 | 0.00421 | 0.00925 |
| RSR2 | 15673766 | CtAH10 | 9.8E-05 | 0.19141 | 0.00424 | 0.01062 |
| RSR2 | 45484275 | CtAH06 | 0.00032 | 0.17747 | 0.00424 | 0.01062 |
| RSR2 | 22763796 | CtAH07 | 0.00039 | 0.15965 | 0.00424 | 0.01062 |
| RSR2 | 45478393 | CtAH06 | 0.00045 | 0.15739 | 0.00424 | 0.01062 |
| RSR3 | 15671516 | CtAH05 | 6.95E-05 | 0.20785 | 2.61E-07 | 0.02615 |
| RSR3 | 22762784 | CtAH03 | 8.56E-05 | 0.19687 | 2.61E-07 | 0.02615 |
| RSR3 | 100005293 | CtAH06 | 7.02E-04 | 0.12908 | 2.61E-07 | 0.02615 |
| RSR3 | 38079594 | CtAH05 | 7.02E-04 | 0.12908 | 2.61E-07 | 0.02615 |
| RSR4 | 15671212 | CtAH03 | 7.7E-05 | 0.19119 | 0.00692 | 0.04068 |
| RSR4 | 15674322 | CtAH10 | 0.00024 | 0.16812 | 0.00692 | 0.04068 |
| RSR4 | 38082248 | CtAH04 | 0.00052 | 0.15624 | 0.00692 | 0.04068 |
| RSR4 | 15670530 | CtAH12 | 0.00058 | 0.14554 | 0.00692 | 0.04068 |
| RSR4 | 38078463 | CtAH12 | 0.00062 | 0.15668 | 0.00692 | 0.04068 |
| RSR4 | 15670573 | CtAH11 | 0.00063 | 0.14283 | 0.00692 | 0.04068 |
| RSR4 | 15670907 | CtAH09 | 0.00066 | 0.1387 | 0.00692 | 0.04068 |
| RSR4 | 17814812 | CtAH09 | 0.00079 | 0.13446 | 0.00692 | 0.04068 |
| RSR4 | 15673891 | CtAH09 | 0.00085 | 0.13236 | 0.00692 | 0.04068 |
| RSR4 | 15670079 | CtAH06 | 0.00097 | 0.16337 | 0.00692 | 0.04068 |
